# Supplementary material
Source: Royal Society of Chemistry journal article supplement (doi:10.1039/d6cc00852f)
Supplement: d6cc00852f1.pdf [file d6cc00852f1.pdf]

## Supplementary Information

# Co<sub>2</sub>P as a pre-catalyst: enhancing NO<sub>3</sub>RR activity by controlled surface activation

Paz Stein,<sup>1</sup> Yan Tetarevsky,<sup>1</sup> Yakir Levi-Sagzan,<sup>1</sup> Naor Cohen,<sup>1</sup> Ronen Bar-Ziv,<sup>2\*</sup> Maya Bar-Sadan<sup>1\*</sup>

<sup>1</sup>*Department of Chemistry, Ben Gurion University, Beer-Sheva, 8410501 Israel.*

<sup>2</sup>*Department of Chemistry, Nuclear Research Center Negev, P.O. Box 9001, Beer-Sheva 84190, Israel*

## 1. Experimental Section

### 1.1 Materials

Ammonium chloride (NH<sub>4</sub>Cl, 99.5%) was purchased from Acros Organics. Alfa Aesar supplied sodium hypochlorite solution (11–14% available chlorine), sodium nitroprusside dihydrate (≥99%), salicylic acid (99%), trisodium citrate dihydrate (99%), Nafion D-521 dispersion (5 wt%), and cobalt(II) chloride anhydrous (99.7%), cobalt powder (-400 mesh, 99.5% metals basis). Hexadecylamine (90%), sodium nitrite (NaNO<sub>2</sub>, analysis grade, ≥99%), sodium nitrate-<sup>14</sup>N (≥99.0%), sodium nitrate-<sup>15</sup>N (≥98% atomic, ≥99%), sodium chloride (NaCl, 99.5%), and *N*-(1-naphthyl)ethylenediamine dihydrochloride were obtained from Sigma-Aldrich. Sodium dihydrogen phosphate monohydrate (ACS) and disodium hydrogen phosphate dihydrate (ACS) were sourced from Supelco. 1-Octadecene (90%) was purchased from Thermo Fisher Scientific. Dimethyl sulfoxide-d<sub>6</sub> (99.9%) was obtained from Cambridge Isotope Laboratories, Inc. Chloroform, sodium hydroxide, and isopropyl alcohol were supplied by Bio-Lab Ltd., and ethanol was purchased from Romical. Triphenyl phosphite (97%) was obtained from Stern Chemicals. All aqueous solutions were prepared using deionized water purified with a Milli-Q system (resistivity ≥18.2 MΩ·cm).

### 1.2 Catalyst synthesis

Co<sub>2</sub>P nanorods were synthesized via a colloidal route adapted from a reported procedure.[1] In a 100 mL three-neck round-bottom flask, 10 mmol of hexadecylamine were dissolved in 25.34 mL of octadecene. The mixture was heated to 50 °C under continuous vacuum evacuation with

stirring for 0.5 h. Subsequently, 10 mmol of triphenyl phosphite were injected, and the temperature was increased to 60 °C and maintained under vacuum for an additional 0.5 h. Separately, 1 mmol of anhydrous CoCl<sub>2</sub> was dispersed in 2 mL of ethanol. The resulting solution was rapidly injected into the reaction flask, which had been continuously purged with N<sub>2</sub>. The temperature was gradually raised to 150 °C and held for 1 h to remove ethanol and ensure an inert environment. After this step, the system was maintained under a continuous N<sub>2</sub> flow, and the temperature was increased to 270 °C and held for 1 h. Upon completion of the reaction, the heating was switched off, and the flask was allowed to cool slowly to 150 °C before removal from the heating mantle. The obtained powder was collected, washed thrice with a chloroform/isopropanol mixture (1:5, v/v), dried under vacuum, and stored in a glovebox.

### 1.3 Characterization methods

*Transmission electron microscopy (TEM)* images were captured using a Tecnai T12 G2 TWIN Thermo Fisher transmission electron microscope. The sample was prepared by dissolving a small amount of catalyst powder in ethanol, ultrasonicated for 15 minutes, then drop casting 20 µL onto a Cu grid (300 mesh, TED PELLA, INC).

*X-ray diffraction (XRD)* measurement was carried out using a Rigaku XtalLAB Synergy single crystal X-ray diffractometer, equipped with a Pilatus detector and a standard Cu K $\alpha$  X-ray source ( $\lambda = 1.51418 \text{ \AA}$ ).

*X-ray photoelectron spectroscopy (XPS)* analysis was conducted using an ESCALAB 250 spectrometer in an ultrahigh vacuum environment ( $1 \times 10^{-9}$  bar), equipped with an Al K $\alpha$  X-ray source and a monochromator.

*Mechanistic study by ATR-IRRAS (Attenuated total reflectance-infrared reflection absorption spectroscopy) measurements:* In situ ATR analysis was performed using a Thermo Nicolet iS50 FTIR spectrometer equipped with a liquid-nitrogen-cooled MCT-A detector. A circular CaF<sub>2</sub> disc (4000-800 cm<sup>-1</sup>) served as both the ATR crystal and IR window. The crystal was mounted on a VeeMAX III ATR accessory (PIKE Technologies), integrated with a custom-designed spectro-electrochemical cell using the Otto geometry to allow simultaneous electrochemical control and infrared data collection. The working electrode was a glassy carbon disk onto which the catalyst was drop-cast as a suspension in isopropyl alcohol with Nafion binder. This coated electrode was pressed firmly against the CaF<sub>2</sub> window using an O-ring to ensure optimal optical contact and seal the thin-layer cell. The setup employed a three-

electrode system, featuring an Ag/AgCl (saturated KCl) reference electrode and a platinum foil counter electrode, all governed by a BioLogic SP-300 potentiostat. The electrolyte solution consisted of phosphate-buffered saline (PBS) with sodium nitrate (NaNO<sub>3</sub>), with concentration adjusted per experiment. Before measurement, the electrolyte was purged with argon for at least 20 minutes and continuously flowed through the cell at 15 mL/min via a peristaltic pump. Background spectra were recorded prior to applying any potential. Infrared spectra were collected in the 1100-4000 cm<sup>-1</sup> range under various electrochemical conditions, including open-circuit voltage (OCV), no applied potential, and during chronoamperometry at selected reduction potentials.

#### 1.4 Electrochemical measurements

Electrochemical measurements were conducted on a BioLogic VSP workstation using a two-compartment H-cell separated by a Nafion 117 membrane. An Ag/AgCl electrode in saturated KCl served as the reference electrode, a 1×1 cm<sup>2</sup> Pt plate was used as the counter electrode, and a catalyst-coated glassy carbon electrode (diameter: 3 mm) was employed as the working electrode, unless otherwise specified. The catalyst ink was prepared by dispersing 1 mg of Co<sub>2</sub>P powder and 1 mg of Vulcan carbon black in a mixture of 200 μL deionized water, 200 μL isopropanol, and 14 μL Nafion solution. The suspension was sonicated for 30 min to obtain a homogeneous ink, and a 15 μL aliquot was drop-cast onto the glassy carbon electrode, yielding a catalyst loading of ~0.5 mg cm<sup>-2</sup>. All electrochemical nitrate reduction reactions were performed in 0.1 M phosphate-buffered saline (PBS) containing 1 M NaNO<sub>3</sub> (pH 6.7). All potentials were corrected for ohmic resistance with 100% iR compensation. Before measurements, the electrolyte was purged with Ar gas for at least 15 min. During measurements, the cathodic compartment was continuously stirred with a magnetic stirrer.

In this study, all potentials were referenced to a reversible hydrogen electrode (RHE) and are reported with 100% iR compensation, following the equation:

$$E_{RHE} = E_{(Ag|AgCl)} + E_{(Ag|AgCl)}^0 + 0.059 \cdot pH$$

The standard reference electrode potential,  $E_{Ag|AgCl}^0$  (sat.KCl), was 0.197 V, and a calibrated pH meter was used to measure the electrolyte's pH value.

The Faradaic efficiency for NH<sub>3</sub> and NO<sub>2</sub><sup>-</sup> was determined using the following equation:

$$FE = \frac{z \cdot C_{product} \cdot V_{half\ cell} \cdot F}{Q_{applied}} \times 100\%$$

Where  $z$  represents the number of electrons transferred during the reaction ( $8 e^-$  for  $\text{NH}_3$ ,  $2 e^-$  for  $\text{NO}_2^-$ ),  $C_{\text{product}}$  is the concentration of the product in the electrolyte ( $\text{mol L}^{-1}$ ),  $V_{\text{half cell}}$  refers to the electrolyte volume of the cathodic half-cell (0.035 L),  $F$  is Faraday's constant ( $96,485 \text{ C mol}^{-1}$ ), and  $Q$  applied indicates the applied charge during the chronoamperometric measurement (C).

The yield rates of  $\text{NH}_3$  production were calculated by:

$$r_{\text{NH}_3} = \frac{C_{\text{NH}_3} \cdot V_{\text{half-cell}}}{t \cdot n_{\text{catalyst}}}$$

Where  $t$  represents the duration of the chronoamperometric measurement in hours, and  $n_{\text{catalyst}}$  denotes the catalyst loading in milligrams.

Potentiostatic electrochemical impedance spectroscopy (PEIS) measurements were performed at an applied potential of  $-0.5 \text{ V}$  vs RHE over a frequency range from 100 kHz to 100 mHz using an AC perturbation amplitude of 10 mV. The impedance data were fitted and simulated using the EC-Lab software (BioLogic) based on an equivalent circuit consisting of a solution resistance ( $R_1$ ) in series with a parallel combination of charge-transfer resistance ( $R_2$ ) and a constant phase element ( $Q_2$ ).

Long-term stability measurements were performed for the  $\text{Co}_2\text{P/Co}$  catalyst at  $-0.55 \text{ V}$  vs. RHE, corresponding to the potential where the catalyst exhibited high  $\text{NH}_3$  yield rate and Faradaic efficiency. The experiment was conducted using a circulating catholyte configuration, in which the cathodic compartment was continuously circulated with a total electrolyte volume of 500 mL throughout the reaction. The electrolyte was continuously purged with Ar and stirred during electrolysis. The measurement was paused three times during the 24 h test to collect electrolyte aliquots for product quantification, after which electrolysis was resumed.

## 2. Surface activation of Co<sub>2</sub>P (Co<sub>2</sub>P/Co preparation)

The Co<sub>2</sub>P catalysts were activated through a two-step procedure adapted from a reported CoP treatment.[2] For reference, the pristine Co<sub>2</sub>P surface is shown in **Figure S1** (top panel), which displays the Co-P peak along with minor Co-O presence. The first activation step involved immersing the Co<sub>2</sub>P-coated electrode in 1 M KOH for 10 minutes, which generated a Co(OH)<sub>2</sub> surface. The corresponding Co 2p spectrum (**Figure S1**, middle panel) shows a dominant oxidation feature at 780.9 eV accompanied by a broad satellite peak at 786.2 eV, matching the characteristic XPS profile of Co(OH)<sub>2</sub> (denoted as oxidized Co and sat.).[3] Immediately afterward, the electrode was transferred to a three-electrode electrochemical cell containing 1 M KOH, where a reduction potential of -0.6 V vs. RHE was applied for 5 minutes. After this reduction step (**Figure S1**, bottom panel), the reduced Co/covalent Co-P/Co<sup>δ+</sup> peak reappears, and the hydroxide-related satellite features diminish, while the oxidized Co-associated envelope becomes more pronounced. This indicates that the hydroxide layer is only partially reduced, with a fraction of the surface cobalt remaining oxidized. Overall, the activation procedure produces a transient hydroxide-rich cobalt surface that is partially reduced under cathodic bias, leading to a reduced cobalt-rich Co<sub>2</sub>P/Co surface. Because the Co 2p region contains overlapping contributions from metallic Co and covalent Co-P environments, the assignment is made based on the full activation sequence, the similarity to the reported CoP → Co(OH)<sub>2</sub> → CoP@Co transformation, and the accompanying electrochemical enhancement, rather than on Co 2p XPS alone.[2]

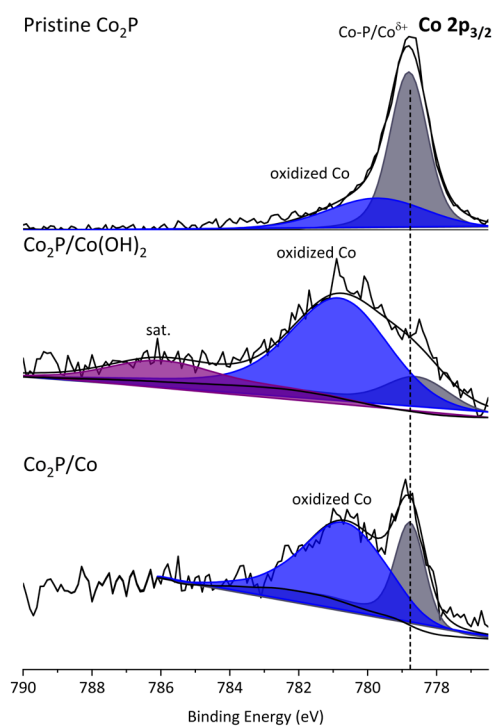

**Figure S1.** High-resolution Co 2p<sub>3/2</sub> XPS spectra of Co<sub>2</sub>P at different activation stages: pristine Co<sub>2</sub>P (top), Co(OH)<sub>2</sub> surface intermediate formed after immersion in 1 M KOH (middle), and Co<sub>2</sub>P/Co surface obtained after electroreduction at -0.6 V vs. RHE (bottom)

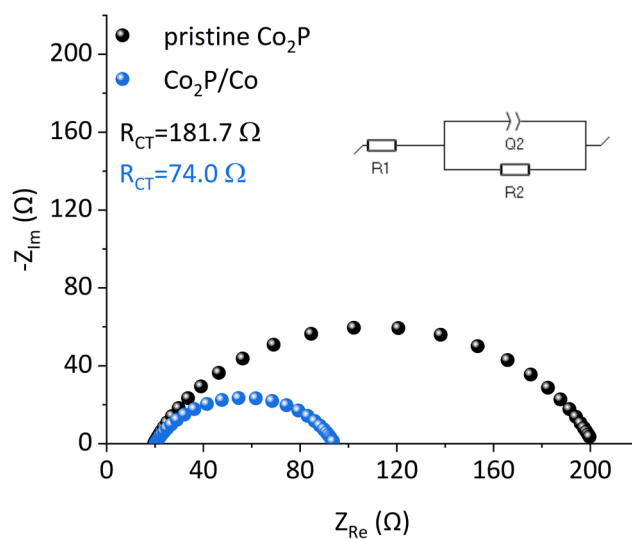

**Figure S2.** Electrochemical impedance spectroscopy Nyquist plots for the pristine Co<sub>2</sub>P and the Co<sub>2</sub>P/Co samples, measured at -0.5 V vs. RHE.

### 3. Colorimetric measurements

Colorimetric measurements were performed with a SHIMADZU UV-3600 UV-vis-NIR spectrophotometer, recording data across the 400-800 nm wavelength range.

#### *Colorimetric quantification of $\text{NH}_4^+$*

The quantification of converted  $\text{NH}_4^+/\text{NH}_3$  was performed using a colorimetric method with indophenol blue. The procedure involved mixing 1 mL of the sampled electrolyte, diluted if needed, with 1 mL of 1 M NaOH solution containing 5% w/w salicylic acid and 5% w/w trisodium citrate. Then, 1 mL of 0.05 M NaClO and 0.1 mL of 1% w/w sodium nitroprusside ( $\text{C}_5\text{FeN}_6\text{Na}_2\text{O}$ ) were added. After 2 hours, the absorbance was measured with a spectrophotometer, and the indophenol blue concentration was determined at 655 nm. The calibration curve was created using various  $\text{NH}_4\text{Cl}$  standards in 0.1 M PBS/ $\text{NaNO}_3$ , as shown in **Figure S3a-b**.

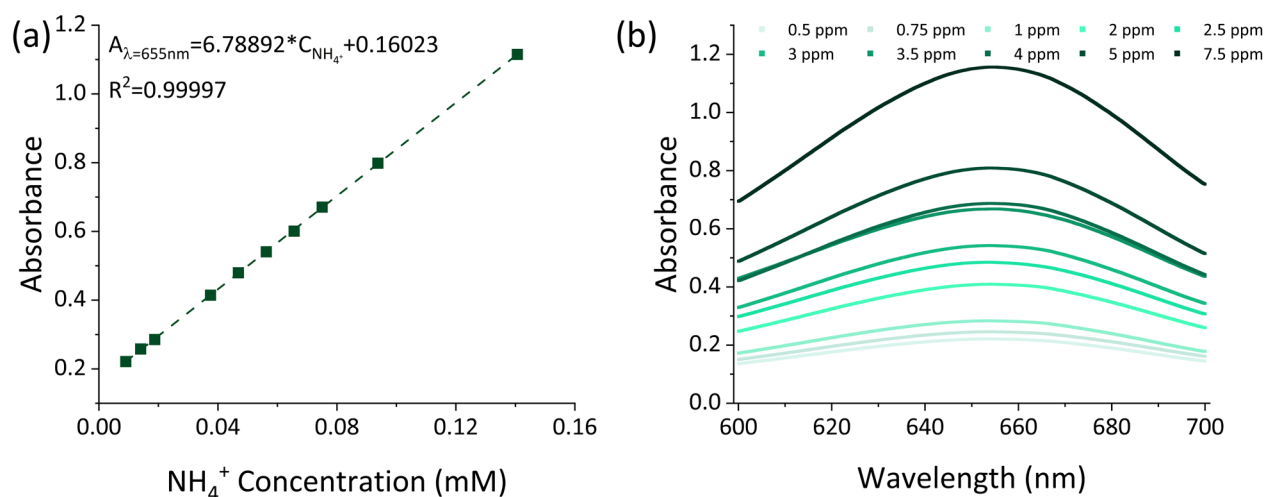

**Figure S3.** a. calibration curve of  $\text{NH}_4^+$  in 0.1 M PBS/ $1\text{M NaNO}_3^-$  electrolyte and the corresponding b. UV-vis spectra of the calibration standards.

### Colorimetric quantification of $\text{NO}_2^-$

The Griess test was used to measure nitrite levels. The color reagent was made by dissolving 0.5 g of sulfanilamide and 0.5 g of N-1-naphtylethylenediamine dihydrochloride in 50 mL of DIW. To develop the sample color, 1 mL of appropriately diluted electrolyte was mixed with 2 mL of DIW and 1 mL of the Griess reagent. After 20 minutes, the absorbance of the sample was read at 540 nm. A calibration curve was generated using a series of  $\text{NaNO}_2$  standards prepared in 0.1 M PBS/ $\text{NaNO}_3$ , measured as described (see **Figure S4a-b**).

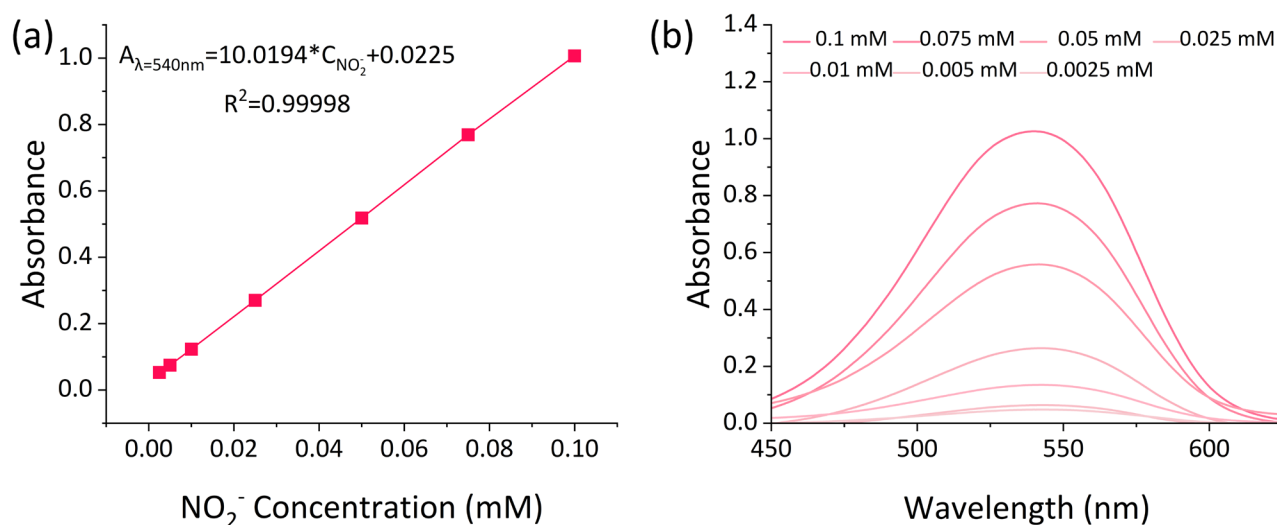

**Figure S4.** **a.** calibration curve of  $\text{NO}_2^-$  in 0.1 M PBS/1 M  $\text{NaNO}_3$  electrolyte and the corresponding **b.** UV-vis spectra of the calibration standards.

#### 4. Determination of $\text{NH}_4^+$ concentration by $^1\text{H}$ NMR

The concentration of electrochemically generated  $\text{NH}_4^+$  was validated by  $^1\text{H}$  NMR spectroscopy using a Bruker AVANCE III-500 spectrometer. For each measurement, 280  $\mu\text{L}$  of electrolyte was mixed with 13  $\mu\text{L}$  of concentrated  $\text{H}_2\text{SO}_4$ , 100  $\mu\text{L}$  of  $\text{DMSO-d}_6$ , and 20  $\mu\text{L}$  of 8.5 mM maleic acid as an internal standard. Water suppression was applied via pre-saturation prior to data acquisition. Quantitative calibration was performed using  $^{15}\text{NH}_4^+$  standards, and the  $\text{NH}_4^+$  concentration obtained by NMR was compared with that determined by the indophenol blue method.

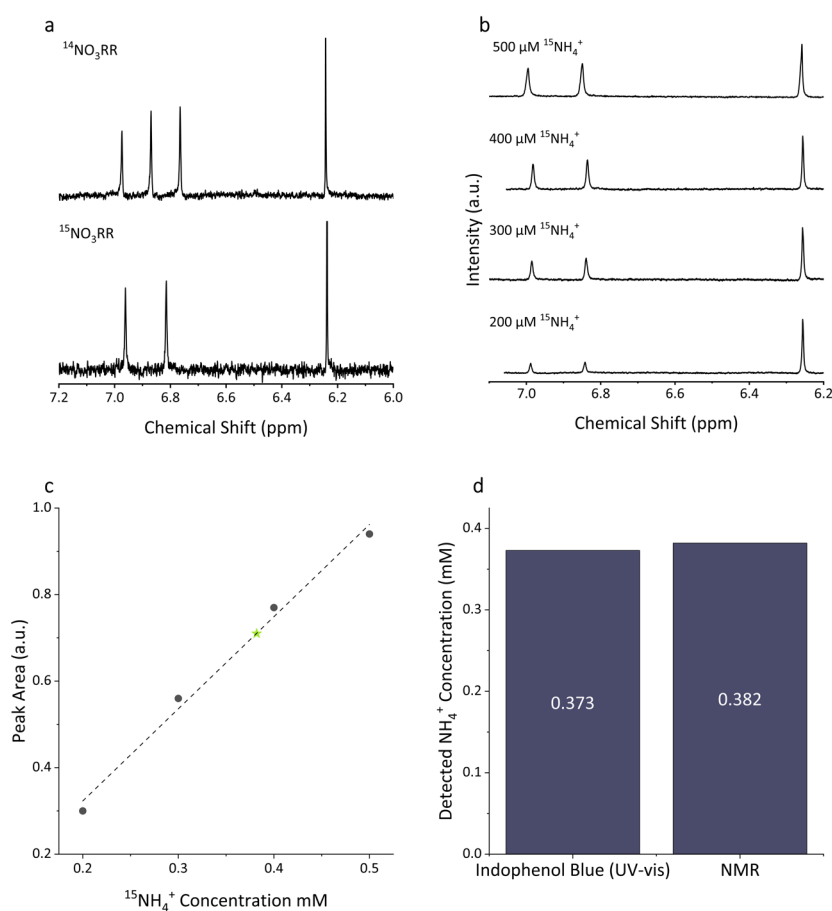

**Figure S5.**  $^1\text{H}$  NMR validation and quantification of  $\text{NH}_4^+$  produced during  $\text{NO}_3\text{RR}$ . **a.**  $^1\text{H}$  NMR spectra of  $\text{NH}_4^+$  generated from  $^{14}\text{NO}_3^-$  and  $^{15}\text{NO}_3^-$  reduction. **b.**  $^1\text{H}$  NMR spectra of  $^{15}\text{NH}_4^+$  calibration standards prepared at different concentrations using maleic acid as an internal standard. **c.** Calibration curve obtained from the integrated  $^{15}\text{NH}_4^+$  peak area; the green marker symbolizes the  $\text{NO}_3\text{RR}$  sample. **d.** Comparison of  $\text{NH}_4^+$  concentration determined by the indophenol blue method and quantitative  $^1\text{H}$  NMR.

## 5. Complementary Data

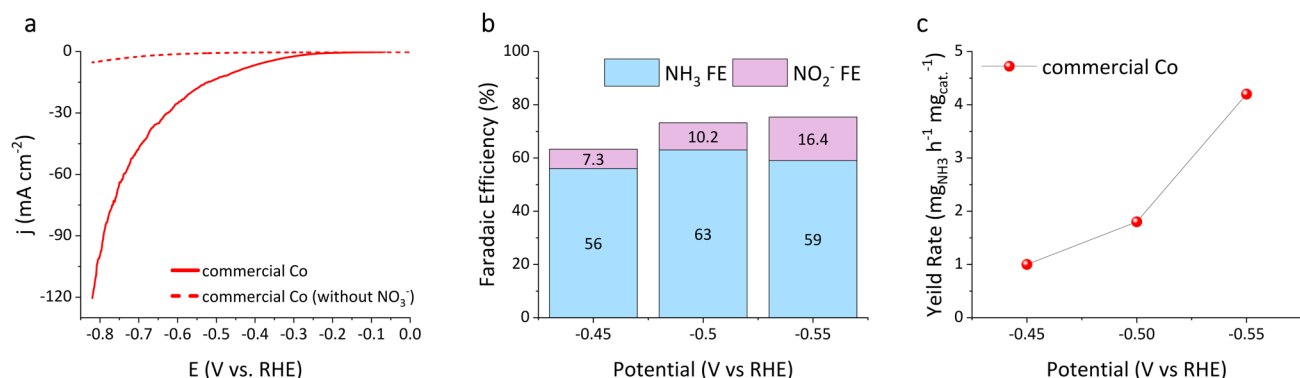

**Figure S6.** Electrocatalytic NO<sub>3</sub>RR performance of commercial Co powder. **a.** LSV curves recorded in 0.1 M PBS with and without 1 M NaNO<sub>3</sub>. **b.** NH<sub>3</sub> and NO<sub>2</sub><sup>-</sup> Faradaic efficiencies at selected potentials. **c.** Corresponding NH<sub>3</sub> yield rates.

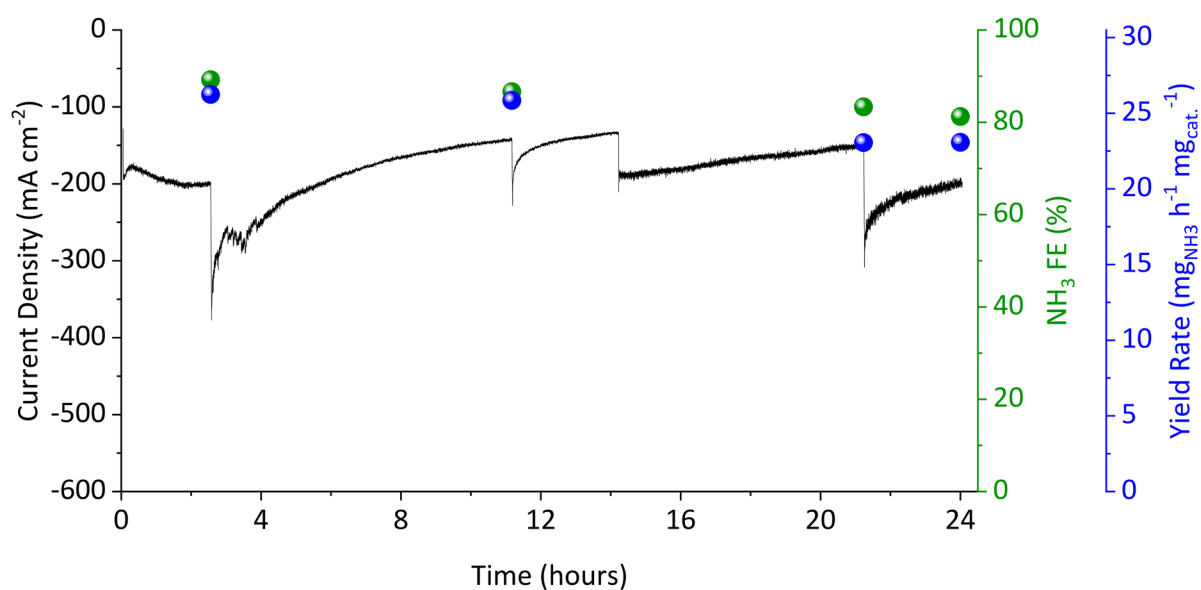

**Figure S7.** Long-term NO<sub>3</sub>RR stability test of Co<sub>2</sub>P/Co at -0.55 V vs. RHE. The black curve shows the current density over 24 h, while the green and blue markers show the NH<sub>3</sub> Faradaic efficiency and NH<sub>3</sub> yield rate, respectively.

**Table S1.** Benchmarking of NO<sub>3</sub>RR performance for Co<sub>2</sub>P, Co<sub>2</sub>P/Co, commercial Co, and selected reported Co-based and transition-metal phosphide electrocatalysts.

| catalyst type                                                                 |                          |                                                                                   |                                                       |                                                      | J <sub>NH<sub>3</sub></sub> | FE    | Ref.                 |
|-------------------------------------------------------------------------------|--------------------------|-----------------------------------------------------------------------------------|-------------------------------------------------------|------------------------------------------------------|-----------------------------|-------|----------------------|
|                                                                               | potential<br>V vs<br>RHE | Electrolyte                                                                       | NH <sub>3</sub> Yield Rate                            |                                                      |                             |       |                      |
|                                                                               |                          |                                                                                   | mg h <sup>-1</sup><br>mg <sub>cat</sub> <sup>-1</sup> | mmol h <sup>-1</sup><br>cm <sup>-2</sup>             | mA<br>cm <sup>-2</sup>      | %     |                      |
| Co <sub>2</sub> P/Co                                                          | -0.55 V                  | 0.1 M PBS<br>+ 1 M<br>NaNO <sub>3</sub>                                           | 21.3                                                  | 0.652                                                | -139                        | 87    | <b>This<br/>work</b> |
| Pristine Co <sub>2</sub> P                                                    |                          |                                                                                   | 3.8                                                   | 0.115                                                | -24.3                       | 79    |                      |
| Commercial<br>Co                                                              |                          |                                                                                   | 4.2                                                   | 0.126                                                | -26.8                       | 59    |                      |
| CoP@Co                                                                        | -0.2 V                   | 1 M<br>KOH+0.5 M<br>KNO <sub>3</sub>                                              | 17.88                                                 | 1.05                                                 | -149                        | 96.70 | [2]                  |
| CoP porous<br>amorphous<br>nanoshuttles                                       | -0.5                     | 0.5 M<br>K <sub>2</sub> SO <sub>4</sub> +0.05<br>M KNO <sub>3</sub>               | 19.28                                                 | 0.163                                                | -                           | 94.24 | [4]                  |
| Ti plate<br>supported Co-<br>P alloy film<br>(Co-P/TP)                        | -0.6                     | 0.2 M<br>Na <sub>2</sub> SO <sub>4</sub> +200<br>ppm NO <sub>3</sub> <sup>-</sup> | -                                                     | 0.0224 (416<br>μg h <sup>-1</sup> cm <sup>-2</sup> ) | -                           | 93.6  | [5]                  |
| CoP nanosheet<br>arrays grown<br>on carbon<br>fiber cloth<br>(CoP<br>NAs/CFC) | -0.3                     | 1 M KOH+<br>1 M NaNO <sub>3</sub>                                                 | 96.9                                                  | 9.56                                                 | -                           | ~100  | [6]                  |
| amorphoous<br>Co-P@Ni<br>foam                                                 | -0.3                     | 1 M KOH +<br>1 M NO <sub>3</sub> <sup>-</sup>                                     | 49.4                                                  | 9.33                                                 | 2000                        | 97.5  | [7]                  |
| CoP nanorings<br>(CoP NRs)                                                    | -0.5                     | 0.5 M<br>Na <sub>2</sub> SO <sub>4</sub> +50<br>mM NaNO <sub>3</sub>              | 30.1                                                  | -                                                    | -                           | 97.1  | [8]                  |
| <u>CoP@P-yeast</u>                                                            | -0.25                    | 1M NaOH+<br>1M NaNO <sub>3</sub>                                                  | 33                                                    | -                                                    | -                           | 67.6  | [9]                  |
| CoP-CNS on<br>copper foam                                                     | -1.03                    | 1 M KOH+<br>1M KNO <sub>3</sub>                                                   | 51.6                                                  | 8.47                                                 | 1860                        | 88.6  | [10]                 |
| Fe-doped CoP<br>nanohoops<br>(Fe-/CoP<br>NHs)                                 | -0.25 V                  | 1 M<br>KOH+50<br>mM KNO <sub>3</sub>                                              | 27.6                                                  | -                                                    | -                           | 93.3  | [11]                 |

|                                                        |                                             |                                                                               |       |       |   |       |      |
|--------------------------------------------------------|---------------------------------------------|-------------------------------------------------------------------------------|-------|-------|---|-------|------|
| Cu <sub>3</sub> P/CoP                                  | -0.9                                        | 0.1 M KOH+0.1M KNO <sub>3</sub>                                               | -     | 1.04  | - | 97.95 | [12] |
| Ni <sub>2</sub> P                                      | -1.2 V vs Hg/HgO (~ -0.9 V <sub>RHE</sub> ) | 0.5 Na <sub>2</sub> SO <sub>4</sub> + 80 mg/L NO <sub>3</sub> <sup>-</sup> -N | 0.95  | 0.16  | - | 99.2  | [13] |
| Fe/Ni <sub>2</sub> P                                   | -0.4                                        | 0.2 K <sub>2</sub> SO <sub>4</sub> + 50 mM KNO <sub>3</sub>                   | 2.09  | 0.245 | - | 94.3  | [14] |
| Fe <sub>2</sub> P                                      | -0.55                                       | 0.5 M NaOH+ 0.2 M NO <sub>3</sub> <sup>-</sup>                                | -     | 0.25  | - | 96    | [15] |
| amorphous cobalt phosphate in carbon matrix (Co-P-O/C) | -0.2                                        | 1 M KOH + 0.1 M KNO <sub>3</sub>                                              | 20.14 | 0.401 |   | 97    | [16] |
| np-Co <sub>0.34</sub> Cu <sub>0.66</sub> P             | -0.3                                        | 1M KOH+ 0.1 M NaNO <sub>3</sub>                                               | -     | 1.8   | - | 93.38 | [17] |

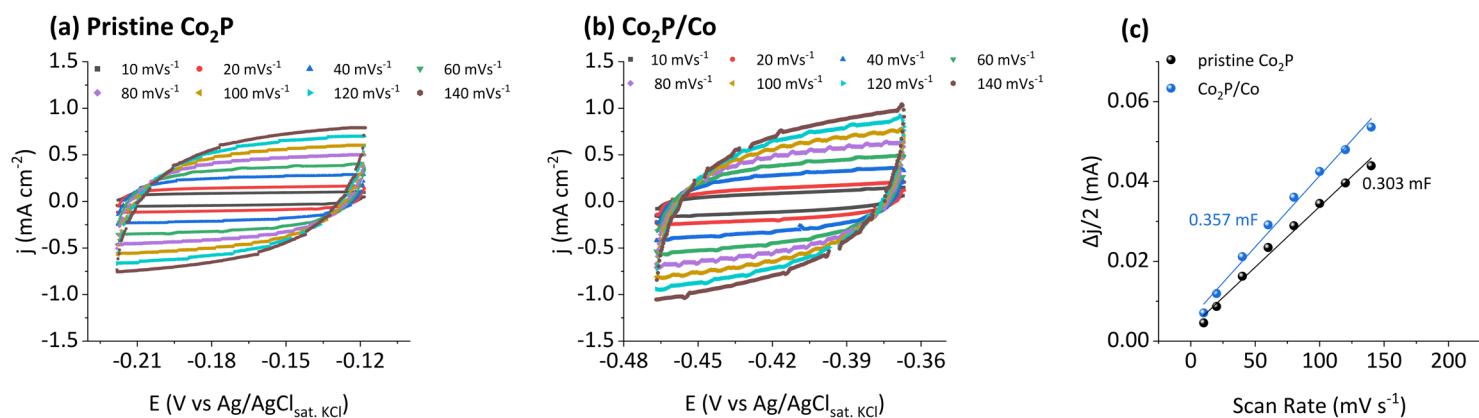

**Figure S8.** Double-layer capacitance ( $C_{dl}$ ) measurements: cyclic voltammograms of **a.** pristine Co<sub>2</sub>P, **b.** Co<sub>2</sub>P/Co samples and **c.** the corresponding mean mid-current density vs. scan rate linear trends.

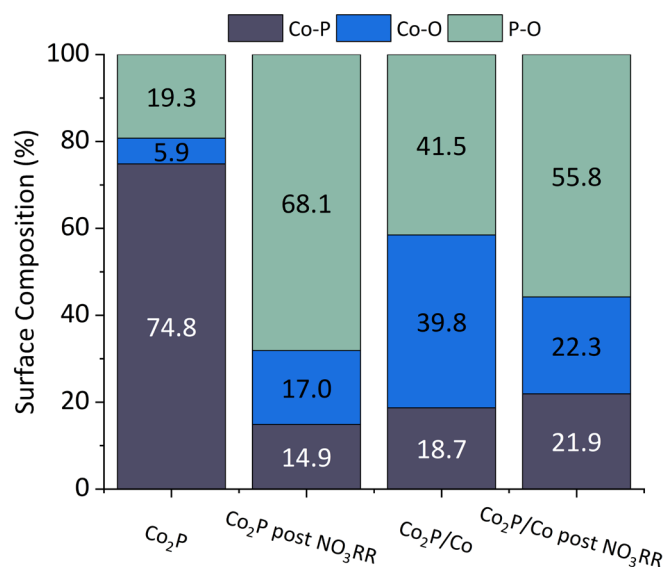

**Figure S9.** Quantitative XPS surface composition of Co<sub>2</sub>P and Co<sub>2</sub>P/Co before and after NO<sub>3</sub>RR.

**Table S2.** In situ ATR-FTIR peak positions corresponding to the detected signals in Co<sub>2</sub>P and Co<sub>2</sub>P/Co spectra.

| Peak position (cm <sup>-1</sup> ) | Observed in          | Assignment                                         | References |
|-----------------------------------|----------------------|----------------------------------------------------|------------|
| 1130–1150                         | Co <sub>2</sub> P/Co | *N-O vibration of adsorbed NO <sub>x</sub> species | [10, 18]   |
| 1220–1260                         | Co <sub>2</sub> P    | *NO <sub>2</sub> <sup>-</sup>                      | [18, 19]   |
| 1290–1300                         | Co <sub>2</sub> P    | NH <sub>2</sub> wagging mode                       | [20]       |
| 1340–1360                         | Co <sub>2</sub> P/Co | NO <sub>3</sub> <sup>-</sup> (aq)                  | [19]       |
| 1440–1460                         | Both                 | N-H bending                                        | [20]       |
| 1480–1500                         | Co <sub>2</sub> P    | NH <sub>3</sub> /NH <sub>4</sub> <sup>+</sup>      | [21, 22]   |
| 1510–1540                         | Both                 | *NH                                                | [23]       |
| 1585–1590                         | Co <sub>2</sub> P    | *NO                                                | [24]       |
| 1600–1660                         | Both                 | H-O-H bending (adsorbed H <sub>2</sub> O)          | [19, 25]   |

## References

1. Bandyopadhyay, D., et al., *Full water splitting electrolyzed by Cu–Co bimetallic phosphides*. ACS Appl. Energy Mater., 2023. **6**(21): p. 10987-10995.
2. Yang, K., et al., *Unveiling the reaction mechanism of nitrate reduction to ammonia over cobalt-based electrocatalysts*. J. Am. Chem. Soc., 2024. **146**(19): p. 12976-12983.
3. Yang, J., et al., *Synthesis and characterization of cobalt hydroxide, cobalt oxyhydroxide, and cobalt oxide nanodiscs*. J. Phys. Chem. C., 2010. **114**(1): p. 111-119.
4. Jia, Y., et al., *Efficient nitrate-to-ammonia electroreduction at cobalt phosphide nanoshuttles*. ACS Appl. Mater. Interfaces, 2021. **13**(38): p. 45521-45527.
5. Li, Z., et al., *High-efficiency nitrate electroreduction to ammonia on electrodeposited cobalt–phosphorus alloy film*. Chem. Commun., 2021. **57**(76): p. 9720-9723.
6. Ye, S., et al., *Elucidating the activity, mechanism and application of selective electrosynthesis of ammonia from nitrate on cobalt phosphide*. Energy Environ. Sci., 2022. **15**(2): p. 760-770.
7. Fan, J.-L., et al., *Electrochemical reduction of nitrate to ammonia on ultra-stable amorphous Co–P electrocatalyst*. J. Mater. Chem. A, 2024. **12**(31): p. 20077-20087.
8. Hong, Q.-L., et al., *Cobalt phosphide nanorings towards efficient electrocatalytic nitrate reduction to ammonia*. Chem. Commun., 2021. **57**(88): p. 11621-11624.
9. Ojima, Y., et al., *Cobalt phosphide-loaded biochar synthesis using phosphate-accumulating yeast and its application as an electrocatalyst*. Biotechnology Reports, 2025. **45**: p. e00874.
10. Fan, K., et al., *Active hydrogen boosts electrochemical nitrate reduction to ammonia*. Nat. Commun., 2022. **13**(1): p. 7958.
11. Hong, Q.-L., et al., *Iron-doped cobalt phosphide nanohoops for electroreduction of nitrate to ammonia*. Inorg. Chem., 2022. **61**(36): p. 14397-14402.
12. Liu, P., et al., *Cu<sub>3</sub>P/CoP Heterostructure for Efficient Electrosynthesis of Ammonia from Nitrate Reduction Reaction*. ACS Appl. Mater. Interfaces, 2024. **17**(1): p. 980-990.
13. Yao, Q., et al., *Selective electrocatalytic reduction of nitrate to ammonia with nickel phosphide*. ACS Appl. Mater. Interfaces., 2021. **13**(26): p. 30458-30467.
14. Zhang, R., et al., *Efficient ammonia electrosynthesis and energy conversion through a Zn-nitrate battery by iron doping engineered nickel phosphide catalyst*. Adv. Energy Mater., 2022. **12**(13): p. 2103872.
15. Chouki, T., et al., *Highly active iron phosphide catalysts for selective electrochemical nitrate reduction to ammonia*. J. Environ. Chem. Eng., 2023. **11**(2): p. 109275.
16. Lei, F., et al., *Amorphous cobalt phosphate incorporated in carbon matrix as an efficient pre-catalyst for promoted electrosynthesis of ammonia*. J. Mater. Chem. A, 2023. **11**(31): p. 16854-16859.
17. Huang, Y., et al., *Enhanced Nitrate Reduction Performance of Cu-Doped Nanoporous Co<sub>2</sub>P Electrocatalyst*. Nanomater., 2025. **15**(10): p. 753.
18. Dai, Y., et al., *Tandem Active Sites in Cu/Mo-WO<sub>3</sub> Electrocatalysts for Efficient Electrocatalytic Nitrate Reduction to Ammonia*. Adv. Funct. Mater., 2025. **35**(20): p. 2420282.
19. Da Cunha, M., M. Weber, and F.C. Nart, *On the adsorption and reduction of NO<sub>3</sub><sup>-</sup> ions at Au and Pt electrodes studied by in situ FTIR spectroscopy*. J. Electroanal. Chem., 1996. **414**(2): p. 163-170.
20. Yao, Y., et al., *A spectroscopic study of electrochemical nitrogen and nitrate reduction on rhodium surfaces*. Angew. Chem. Int. Ed., 2020. **132**(26): p. 10565-10569.

21. Dong, J.H., et al., *Engineering Ce promoter to regulate H\* species to boost tandem electrocatalytic nitrate reduction for ammonia synthesis*. Adv. Funct. Mater., 2025. **35**(25): p. 2422025.
22. Li, S., et al., *Localized enriching nitrate/proton on reconstituted Fe nanoparticles boosting electrocatalytic nitrate reduction to ammonia*. J. Energy Chem., 2025. **103**: p. 682-691.
23. Zhang, M., et al., *Hydration-effect Boosted Active Hydrogen Facilitates Neutral Ammonia Electrosynthesis from Nitrate Reduction*. Adv. Funct. Mater., 2025. **35**(2): p. 2413070.
24. Zhang, S., et al., *Concurrently Selective Electrosynthesis of Ammonia and Glycolic Acid Over Cathodic Single-Atom Cobalt and Anodic PdNi Alloying Catalysts*. Adv. Funct. Mater., 2025. **35**(6): p. 2415046.
25. Yesudoss, D.K., et al., *Time-Resolved Fourier Transform Infrared Spectroelectrochemical Investigation of Nitrate Reduction to Ammonia*. ACS Energy Lett., 2025. **10**(4): p. 1688-1699.
